# Supplementary material
Source: MDPI journal article supplement (https://www.mdpi.com/2071-1050/11/20/5798)
Supplement: s1 [file s1]

**Table S1.** List of Measures.

| Constructs                                                | Items | Statement                                                                                                                                                                                 | Source                                                                                                                                          |
|-----------------------------------------------------------|-------|-------------------------------------------------------------------------------------------------------------------------------------------------------------------------------------------|-------------------------------------------------------------------------------------------------------------------------------------------------|
| Auditors' responsibility for fraud detection (ARF)        | ARF1  | The auditor is primarily responsible for the prevention and detection of fraud and error of the entity.                                                                                   | Pourheydari & Abousaiedi, 2011, Dixon et al., 2006; Ruhnke & Schmidt, 2014; Porter & Gowthorpe, 2004; Hogan et al., 2008; Salehi & Azary, 2009. |
|                                                           | ARF2  | Auditor can detect all misstatements due to fraud and error.                                                                                                                              |                                                                                                                                                 |
|                                                           | ARF3  | Auditor should be held responsible if the entity goes bankrupt due to fraud.                                                                                                              |                                                                                                                                                 |
|                                                           | ARF4  | Auditor can conclude that there are no illegal operations conducted by the audited company.                                                                                               |                                                                                                                                                 |
| Meaning and usefulness of audit report (MUAR)             | MUAR1 | The unmodified audit report is a clean report and gives users significantly high level of confidence in the company's management.                                                         | Asare & Wright, 2012; T. J. Mock et al., 2012; Coram et al., 2011; Gray et al., 2011; Dixon et al., 2006.                                       |
|                                                           | MUAR2 | A modified opinion is used when the auditor's scope has been restricted by clients or the auditor is not independent.                                                                     |                                                                                                                                                 |
|                                                           | MUAR3 | Audit report is useful for taking investment decision.                                                                                                                                    |                                                                                                                                                 |
|                                                           | MUAR4 | Audit report is useful for assessing whether the company is well managed.                                                                                                                 |                                                                                                                                                 |
|                                                           | MUAR5 | Audited financial statements are useful for monitoring the performance of the entity.                                                                                                     |                                                                                                                                                 |
| Expectation for going concern reporting assessment (EGCR) | EGCR1 | Auditor make an assessment of an entity's ability to continue as a going concern.                                                                                                         | IAASB, 2009e; IAASB, 2015a; Carson et al., 2012; Gray et al., 2011; Lee et al., 2009.                                                           |
|                                                           | EGCR2 | The auditors can conclude that the company will continue as a going concern in the near future.                                                                                           |                                                                                                                                                 |
|                                                           | EGCR3 | Auditor can forecast whether the entity has sufficient liquidity to operate through the next year.                                                                                        |                                                                                                                                                 |
|                                                           | EGCR4 | Audit report can provide early warning of corporate failure.                                                                                                                              |                                                                                                                                                 |
| Expectation for other assurance (EOA)                     | EOA1  | Information contained in the management discussion and analysis (MD&A), directors report, management performance analysis, graphs and charts, are useful and that information is audited. | Mock et al., 2012; Simnett, Vanstraelen, & Chua, 2009; Brown-Liburd & Zamora, 2014.                                                             |
|                                                           | EOA2  | Auditors provide opinion on the entity's corporate social reporting (CSR) included in the annual report.                                                                                  |                                                                                                                                                 |
|                                                           | EOA3  | Information contained in the entity's environmental and sustainability reports are useful indicators of investment decision and those are audited by the external auditor.                |                                                                                                                                                 |
| Restriction on provision of non-audit services (RNASs)    | RNAS1 | Provision of non-audit services creates conflict of interest between auditor and client.                                                                                                  | Salehi 2009; Beattie et al., 1999; Olagunju, 2011; Lim and Tan 2008; Umar and Anandarajan 2004.                                                 |
|                                                           | RNAS2 | Audit firm should not provide other services except audit like review, consultancy and other attestation services.                                                                        |                                                                                                                                                 |
|                                                           | RNAS3 | Auditors can provide non audit services and still remain independent.                                                                                                                     |                                                                                                                                                 |
|                                                           | RNAS4 | Restriction on providing non audit service enhances audit independence, therefore increase confidence in audit services.                                                                  |                                                                                                                                                 |
| Mandatory audit firm rotation (MAR)                       | MAR1  | Due to long audit tenure, auditors become familiar with the client and work to maximize client interest.                                                                                  | Bazerman et al. 1997; Yip & Pang, 2017; PCAOB 2011a.                                                                                            |
|                                                           | MAR2  | Mandatory Audit firm rotation after every 3 years, enhances audit independence.                                                                                                           |                                                                                                                                                 |
|                                                           | MAR4  | Mandatory Auditors Rotation increase audit startup cost and increase the risk of audit failure.                                                                                           |                                                                                                                                                 |
| Communication with the active audit committee (CAC)       | CAC1  | Auditors maintain ongoing communication with Audit committee ensure better transparency of audit work.                                                                                    | IAASB, 2009c; IAASB, 2009d, 1976; Salleh and Stewart 2012; Krishnamoorthy et al. 2002.                                                          |

|                                           |      |                                                                                                                                                                               |                                                                                                                  |
|-------------------------------------------|------|-------------------------------------------------------------------------------------------------------------------------------------------------------------------------------|------------------------------------------------------------------------------------------------------------------|
|                                           | CAC2 | Presence of an effective audit committee can ensure auditors independence and act as a protector of investors' interest.                                                      |                                                                                                                  |
|                                           | CAC3 | Audit committee disclosure is an important source of information regarding the independence of auditor.                                                                       |                                                                                                                  |
| Improving audit report (IAR)              | IAR1 | Audit reports contain information that entity is free from fraud.                                                                                                             | IAASB, 2011; IAASB, 2015; IAASB, 2012; Asare & Wright, 2012; European commission, 2010; T. J. Mock et al., 2012. |
|                                           | IAR2 | Audit reports contain information regarding the key risk factors that materially affects the entity sustainability.                                                           |                                                                                                                  |
|                                           | IAR3 | Audit report should include information about any uncertainty with respect to entity's ability to continue as a going concern.                                                |                                                                                                                  |
|                                           |      |                                                                                                                                                                               |                                                                                                                  |
| Ensure audit education (EAED)             | AEd1 | Training program for shareholders specially discuss about role of audit in the annual general meeting enhances better understanding about audit.                              | Siddiqui et al., 2009; Epstein & Geiger, 1994; Monroe & Woodliff, 1994.                                          |
|                                           | AEd2 | Public accounting firm should participate in local community activities of college and universities in order to create a good impression for the profession.                  |                                                                                                                  |
|                                           | AEd3 | Incorporating more audit courses in the undergraduate level for the accounting students in the university aware them about the role of auditors.                              |                                                                                                                  |
| Investors' confidence (ICF)               | ICF1 | Maintenance of auditor's perceived independence ensure investors' confidence.                                                                                                 | FRC, 2016; Okafor & Otolor, 2013; Sikka et al., 1989; European commission, 2010;                                 |
|                                           | ICF2 | Incorporation of specific information in the audit report regarding the entity is free from fraud enhance investor's confidence.                                              |                                                                                                                  |
|                                           | ICF3 | Incorporating specific information regarding entity's going concern and sustainability helps to predict the potential failure and investors feel confident about the company. |                                                                                                                  |
|                                           | ICF4 | Investors' feel confident at the presence of an independent audit committee.                                                                                                  |                                                                                                                  |
| Role of independent audit oversight (IAO) | IAO1 | Investors feel confident if an independent body monitors the audit procedures done by the auditor.                                                                            | FRC, 2016; Hossain, 2017; Siddiqui, J., 2018; Shil, N.C. 2015; Ahmed M. 2017.                                    |
|                                           | IAO2 | Investors feel confident if an independent body regulate the audit profession and formulate the relevant standards.                                                           |                                                                                                                  |
|                                           | IAO3 | Investors feel confident if an independent body penalizes the auditors for violating any prescribed law.                                                                      |                                                                                                                  |
